# Supplementary material for: Long‐term ecological research and the COVID‐19 anthropause: A window to understanding social–ecological disturbance
Source: PubMed Central journal article supplement (PMC9087370; doi:10.1002/ecs2.4019), 2022-04-08
Supplement: ECS2-13-e4019-s002.pdf [file ECS2-13-e4019-s002.pdf]

Gaiser, E. E., J. S. Kominoski, D. M. McKnight, C. A. Bahlai, C. Cheng, S. Record, W. M. Wollheim, K. R. Christianson, M. R. Downs, P. A. Hawman, S. J. Holbrook, A. Kumar, D. R. Mishra, N. P. Molotch, R. B. Primack, A. Rassweiler, R. J. Schmitt, and L. Sutter. 2021. Long-term ecological research and the COVID-19 anthropause: A window to understanding social-ecological disturbance. *Ecosphere*.

## Appendix S1

Table S1. Data supporting Figure 8.

| <b>Column</b>     | <b>Description</b>                                                                                                                                                                                |
|-------------------|---------------------------------------------------------------------------------------------------------------------------------------------------------------------------------------------------|
| Network           | Defines which network(s) the site belongs to (e.g., Long Term Ecological Research Network [LTER], Long Term Agricultural Research Network [LTAR], National Ecological Observatory Network [NEON]) |
| Site              | Site name                                                                                                                                                                                         |
| Site abbreviation | Site name abbreviation for details see respective networks' websites. Two abbreviations are given when sites have different acronyms for the different networks.                                  |
| Built             | Percent of built environment from Global Human Settlement Layer                                                                                                                                   |
| Population        | Population density per square kilometer from the Global Human Settlement Layer                                                                                                                    |

| <b>Network</b> | <b>Site</b>                         | <b>Site abbreviation</b> | <b>Built</b> | <b>Population</b> |
|----------------|-------------------------------------|--------------------------|--------------|-------------------|
| LTAR           | Jornada Experimental Range          | JER                      | 0.01         | 0.06              |
| LTAR           | Great Basin                         | GB                       | 0.01         | 0.17              |
| LTAR           | R. J. Cook Agronomy Farm            | CAF                      | 0.06         | 0.36              |
| LTAR           | Platte River, High Plains Aquifer   | PRHPA                    | 0.70         | 0.85              |
| LTAR           | Archbold-University of Florida      | ABS-UF                   | 0.45         | 3.04              |
| LTAR           | Texas Gulf                          | TG                       | 0.00         | 3.34              |
| LTAR           | Northern Plains                     | NP                       | 0.79         | 4.67              |
| LTAR           | Upper Mississippi River Basin       | UMRB                     | 2.79         | 13.63             |
| LTAR           | Walnut Gulch Experimental Watershed | WGEW                     | 0.56         | 14.55             |

|           |                                   |      |       |         |
|-----------|-----------------------------------|------|-------|---------|
| LTAR      | Southern Plains                   | SP   | 1.34  | 16.27   |
| LTAR      | Gulf Atlantic Coastal Plain       | GACP | 0.96  | 20.41   |
| LTAR      | Lower Mississippi River Basin     | LMRB | 0.23  | 24.89   |
| LTAR      | Central Mississippi River Basin   | CMRB | 3.13  | 56.49   |
| LTAR      | Eastern Corn Belt                 | ECB  | 6.56  | 94.99   |
| LTAR      | Lower Chesapeake Bay              | LCB  | 13.69 | 187.09  |
| LTAR      | Upper Chesapeake Bay              | UCB  | 16.87 | 306.38  |
| LTAR-LTER | Kellogg Biological Station        | KBS  | 3.66  | 37.33   |
| LTAR-NEON | Central Plains Experimental Range | CPER | 0.04  | 0.21    |
| LTER      | California Current Ecosystem      | CCE  | 0.00  | 0.00    |
| LTER      | Florida Coastal Everglades        | FCE  | 3.53  | 4866.00 |
| LTER      | Georgia Coastal Ecosystems        | GCE  | 1.11  | 0.00    |
| LTER      | McMurdo Dry Valleys               | MCM  | 0.00  | 0.00    |
| LTER      | Moorea Coral Reef                 | MCR  | 0.50  | 0.00    |
| LTER      | Minneapolis-St. Paul              | MSP  | 0.23  | 419.81  |
| LTER      | Palmer Antarctica                 | PAL  | 0.00  | 0.00    |
| LTER      | Plum Island Ecosystems            | PIE  | 11.38 | 310.00  |
| LTER      | Santa Barbara Coastal             | SBC  | 1.92  | 0.00    |
| LTER      | Virginia Coast Reserve            | VCR  | 0.54  | 0.00    |
| LTER      | Sevilleta                         | SEV  | 0.03  | 0.04    |
| LTER      | Shortgrass Steppe                 | SGS  | 0.00  | 0.09    |
| LTER      | Andrews Forest                    | AND  | 0.00  | 0.12    |
| LTER      | Hubbard Brook                     | HBR  | 0.16  | 0.88    |
| LTER      | Luquillo                          | LUQ  | 0.05  | 3.38    |
| LTER      | Coweeta                           | CWT  | 0.00  | 4.33    |

|           |                                                       |          |       |         |
|-----------|-------------------------------------------------------|----------|-------|---------|
| LTER      | Cedar Creek Ecosystem                                 | CDR      | 0.57  | 14.03   |
| LTER      | North Temperate Lakes                                 | NTL      | 6.62  | 114.16  |
| LTER      | Central Arizona-Phoenix                               | CAP      | 32.44 | 643.51  |
| LTER      | Baltimore Ecosystem Study                             | BES      | 56.77 | 2002.32 |
| LTER-NEON | Arctic/Toolik Field Station                           | ARC/TOOK | 0.00  | 0.00    |
| LTER-NEON | Jornada Basin/Jornada Experimental Range              | JRN/JORN | 0.05  | 0.52    |
| LTER-NEON | Bonanza Creek/Caribou-Poker Creeks Research Watershed | BNZ/BONA | 0.01  | 0.71    |
| LTER-NEON | Niwot Ridge                                           | NIWO     | 0.02  | 2.42    |
| LTER-NEON | Konza Prairie Biological Station                      | KNZ/KONZ | 0.31  | 2.55    |
| LTER-NEON | Harvard Forest & Quabbin Watershed                    | HFR/HARV | 1.11  | 34.11   |
| NEON      | Guanica Forest                                        | GUAN     | 13.42 | 0.00    |
| NEON      | McRae Creek                                           | MCRA     | 0.00  | 0.00    |
| NEON      | Oksrukuyik Creek                                      | OKSR     | 0.00  | 0.00    |
| NEON      | Red Butte Creek                                       | REDB     | 0.00  | 0.00    |
| NEON      | Smithsonian Environmental Research Center             | SERC     | 7.07  | 0.00    |
| NEON      | Sycamore Creek                                        | SYCA     | 0.00  | 0.00    |
| NEON      | Blacktail Deer Creek                                  | BLDE     | 0.00  | 0.00    |
| NEON      | Yellowstone National Park                             | YELL     | 0.00  | 0.00    |
| NEON      | Delta Junction                                        | DEJU     | 0.02  | 0.05    |
| NEON      | Lower Teakettle                                       | TEAK     | 0.00  | 0.07    |
| NEON      | Teakettle Creek - Watershed 2                         | TECR     | 0.00  | 0.07    |
| NEON      | West St Louis Creek                                   | WLOU     | 0.00  | 0.07    |

|      |                                                           |      |      |      |
|------|-----------------------------------------------------------|------|------|------|
| NEON | Arikaree River                                            | ARIK | 0.01 | 0.21 |
| NEON | Onaqui                                                    | ONAQ | 0.00 | 0.21 |
| NEON | Moab                                                      | MOAB | 0.00 | 0.21 |
| NEON | Healy                                                     | HEAL | 0.00 | 0.33 |
| NEON | Dakota Coteau Field Site                                  | DCFS | 0.05 | 0.40 |
| NEON | Prairie Lake                                              | PRLA | 0.05 | 0.40 |
| NEON | Prairie Pothole                                           | PRPO | 0.05 | 0.40 |
| NEON | Chase Lake National Wildlife Refuge                       | WOOD | 0.05 | 0.40 |
| NEON | Upper Big Creek                                           | BIGC | 0.00 | 0.41 |
| NEON | Soaproot Saddle                                           | SOAP | 0.00 | 0.41 |
| NEON | McDiffett Creek                                           | MCDI | 0.05 | 0.66 |
| NEON | Caribou Creek                                             | CARI | 0.01 | 0.71 |
| NEON | Mayfield Creek                                            | MAYF | 0.03 | 0.73 |
| NEON | Talladega National Forest                                 | TALL | 0.03 | 0.73 |
| NEON | North Sterling                                            | STER | 0.01 | 0.80 |
| NEON | Little Rock Lake                                          | LIRO | 0.00 | 1.13 |
| NEON | Crampton Lake                                             | CRAM | 0.00 | 1.34 |
| NEON | University of Notre Dame<br>Environmental Research Center | UNDE | 0.00 | 1.34 |
| NEON | Martha Creek                                              | MART | 0.08 | 1.51 |
| NEON | Mountain Lake Biological Station                          | MLBS | 0.00 | 1.98 |
| NEON | Como Creek                                                | COMO | 0.02 | 2.42 |
| NEON | Kings Creek                                               | KING | 0.31 | 2.55 |
| NEON | Wind River Experimental Forest                            | WREF | 0.08 | 2.70 |
| NEON | San Joaquin Experimental Range                            | SJER | 0.17 | 3.09 |
| NEON | Treehaven                                                 | TREE | 0.01 | 3.38 |
| NEON | Flint River                                               | FLNT | 0.22 | 3.80 |

|      |                                      |      |      |       |
|------|--------------------------------------|------|------|-------|
| NEON | Lyndon B. Johnson National Grassland | CLBJ | 0.52 | 3.83  |
| NEON | Lenoir Landing                       | LENO | 0.01 | 4.17  |
| NEON | Lower Tombigbee River                | TOMB | 0.01 | 4.17  |
| NEON | Rocky Mountains                      | RMNP | 0.02 | 4.24  |
| NEON | Abby Road                            | ABBY | 0.06 | 4.47  |
| NEON | LeConte Creek                        | LECO | 0.35 | 4.75  |
| NEON | Great Smoky Mountains National Park  | GRSM | 0.35 | 4.76  |
| NEON | Bartlett Experimental Forest         | BART | 0.34 | 4.79  |
| NEON | Santa Rita Experimental Range        | SRER | 0.80 | 5.11  |
| NEON | Steigerwaldt-Chequamegon             | STEI | 0.07 | 5.71  |
| NEON | Blue River                           | BLUE | 0.63 | 8.65  |
| NEON | Marvin Klemme Range Research Station | OAES | 0.36 | 8.81  |
| NEON | The Jones Center At Ichauway         | JERC | 0.85 | 8.89  |
| NEON | Pringle Creek                        | PRIN | 0.68 | 9.07  |
| NEON | Lower Hop Brook                      | HOPB | 0.41 | 19.31 |
| NEON | Oak Ridge                            | ORNL | 4.65 | 21.67 |
| NEON | Walker Branch                        | WALK | 4.65 | 21.67 |
| NEON | Blandy Experimental Farm             | BLAN | 0.84 | 22.27 |
| NEON | Lewis Run                            | LEWI | 0.84 | 22.27 |
| NEON | Lake Barco                           | BARC | 1.52 | 28.62 |
| NEON | Lake Suggs                           | SUGG | 1.52 | 28.62 |
| NEON | Black Warrior River                  | BLWA | 4.64 | 48.25 |
| NEON | Dead Lake                            | DELA | 4.64 | 48.25 |
| NEON | Rio Guilarte                         | GUIL | 1.10 | 53.76 |
| NEON | Rio Cupeyes                          | CUPE | 1.29 | 56.16 |
| NEON | Ordway-Swisher Biological Station    | OSBS | 2.59 | 69.02 |

|      |                                            |      |       |        |
|------|--------------------------------------------|------|-------|--------|
| NEON | Posey Creek                                | POSE | 2.91  | 98.21  |
| NEON | Smithsonian Conservation Biology Institute | SCBI | 2.91  | 98.21  |
| NEON | University of Kansas Field Station         | UKFS | 5.73  | 106.00 |
| NEON | Northern Great Plains Research Laboratory  | NOGP | 7.51  | 113.16 |
| NEON | Utqiagvik                                  | BARR | 4.63  | 172.36 |
| NEON | Disney Wilderness Preserve                 | DSNY | 9.38  | 198.01 |
| NEON | Lajas Experimental Station                 | LAJA | 10.05 | 222.55 |
| NEON | Konza Prairie Agroecosystem                | KONA | 27.79 | 618.52 |
